# Supplementary material
Source: PubMed Central journal article supplement (PMC2596198)
Supplement: 0809584105_ST1_PDF.pdf [file 0809584105_ST1_PDF.pdf]

**Table S1. General genome features of sequenced bifidobacteria**

|                          |                      | <i>B. longum</i> subsp.<br><i>infantis</i> ATCC 15697 | <i>B. longum</i> subsp.<br><i>longum</i> NCC2705 <sup>1</sup> | <i>B. adolescentis</i><br>ATCC 15703 |
|--------------------------|----------------------|-------------------------------------------------------|---------------------------------------------------------------|--------------------------------------|
| Size (bp)                |                      | 2,832,748                                             | 2,260,266                                                     | 2,089,645                            |
| G+C content              |                      | 59.86%                                                | 60.13%                                                        | 59.18%                               |
| Predicted coding density |                      | 87.30%                                                | 86.40%                                                        | 87.87%                               |
| Open reading frames      | Protein-coding (CDS) | 2423                                                  | 1729                                                          | 1631                                 |
|                          | rRNA operons         | 4                                                     | 4                                                             | 5                                    |
|                          | tRNA                 | 79                                                    | 57                                                            | 54                                   |
| Functional prediction    | Gene assigned COG    | 1633                                                  | 1336                                                          | 1274                                 |
|                          | Gene assigned PFAM   | 1672                                                  | 1336                                                          | 1263                                 |
|                          | Gene assigned enzyme | 273                                                   | 109                                                           | 94                                   |
| Two component regulation | Sensor kinase        | 23                                                    | 10                                                            | 12                                   |
|                          | Response regulator   | 24                                                    | 10                                                            | 12                                   |

<sup>1</sup>Represents two autonomous replicons
