# Supplementary material
Source: PubMed Central journal article supplement (PMC2596198)
Supplement: 0809584105_ST2_PDF.pdf [file 0809584105_ST2_PDF.pdf]

**Table S2. Mobile genetic elements of *B. longum* subsp. *infantis* ATCC15697**

**Prophage-like elements**

| <b>Genome coordinates (bp)</b> | <b>size (kbp)</b> |
|--------------------------------|-------------------|
| 1,288,652 - 1,331,024          | 42.4              |
| 1,660,193 - 1,691,632          | 30.7              |
| 1,694,157 - 1,722,246          | 28.1              |
| 1,956,497 - 1,995,578          | 39.1              |

**Integrated plasmid remnants**

**genomic copies**

|                            |   |
|----------------------------|---|
| addiction module toxin     | 4 |
| addiction module antitoxin | 6 |
| rep protein (PF0179)       | 1 |

**IS element family representation**

**genomic copies**

|             |    |
|-------------|----|
| IS110       | 9  |
| IS200/IS605 | 3  |
| IS21        | 3  |
| IS256       | 10 |
| IS3         | 12 |
| IS30        | 12 |
| IS5         | 3  |
| IS605       | 3  |
| IS607       | 2  |
| ISL3        | 3  |
