# Supplementary material
Source: PubMed Central journal article supplement (PMC2596198)
Supplement: 0809584105_ST3_PDF.pdf [file 0809584105_ST3_PDF.pdf]

**Table S3. Two component regulatory systems and their immediate adjacent genes in *B. longum* subsp. *infantis* ATCC15697**

| Sensor kinase          | COG     | Response regulator | COG     | Adjacent genes in cluster                                    | Predicted function of gene cluster        |
|------------------------|---------|--------------------|---------|--------------------------------------------------------------|-------------------------------------------|
| Blon_1774              | COG3920 | none               | N/A     | none                                                         | N/A                                       |
| Blon_0067              | COG4585 | Blon_0066          | COG2197 | major facilitator superfamily, polysaccharide phosphorylase  | polysaccharide degradation                |
| Blon_0244              | COG4585 | Blon_0243          | COG2197 | major facilitator superfamily, alpha-fucosidase              | fucosylated polysaccharide degradation    |
| Blon_0432              | COG4585 | Blon_0433          | COG2197 | major facilitator superfamily                                | sugar transport                           |
| Blon_0464              | COG4585 | Blon_0463          | COG2197 | membrane transporter, N-acetyl-beta-hexosaminidase           | polysaccharide degradation                |
| Blon_0472              | COG4585 | Blon_0471          | COG2197 | Lanthionine synthetase C family, protease II                 | protein modification                      |
| Blon_0482              | COG4585 | Blon_0481          | COG2197 | ABC transport-related                                        | unknown                                   |
| Blon_0500              | COG4585 | Blon_0501          | COG2197 | none <sup>2</sup>                                            | N/A                                       |
| Blon_1047              | COG4585 | Blon_1048          | COG2197 | peptidase                                                    | protein degradation                       |
| Blon_1415              | COG4585 | Blon_1414          | COG2197 | none                                                         | N/A                                       |
| Blon_1632              | COG4585 | Blon_1633          | COG2197 | alpha amylase                                                | polysaccharide degradation                |
| Blon_1692              | COG4585 | Blon_1693          | COG2197 | unknown, transport-related, O-acetylhomoserine sulfhydrylase | cysteine metabolism                       |
| Blon_1748              | COG4585 | Blon_1749          | COG2197 | DNA excinuclease                                             | DNA replication, repair and recombination |
| Blon_1857              | COG4585 | Blon_1858          | COG2197 | none                                                         | N/A                                       |
| Blon_2169              | COG4585 | Blon_2170          | COG2197 | UDP-glucose 4-epimerase                                      | LNB utilization                           |
| Blon_0361              | COG5002 | Blon_0362          | COG0745 | phosphate transporter                                        | phosphate transport                       |
| Blon_0509              | COG0642 | Blon_0510          | COG0745 | hypothetical proteins                                        | unknown                                   |
| Blon_0698              | COG0642 | Blon_0697          | COG0745 | Cold shock protein                                           | stress response                           |
| Blon_1004              | COG0642 | Blon_1003          | COG0745 | none                                                         | unknown                                   |
| Blon_1763              | COG0642 | Blon_1762          | COG0745 | alpha amylase                                                | polysaccharide degradation                |
| Blon_1908 <sup>1</sup> | COG0642 | none               | N/A     | Sialic acid-specific 9-O-acetylerase                         | polysaccharide degradation                |
| Blon_2150              | COG0642 | none               | N/A     | none                                                         | N/A                                       |
| none                   | N/A     | Blon_0278          | COG0745 | Extracellular solute binding protein, endonuclease           | unknown                                   |
| none                   | N/A     | Blon_0965          | COG0745 | none                                                         | N/A                                       |
| Blon_0216              | COG4585 | Blon_0215          | COG2197 | peptidase                                                    | protein degradation                       |
| Blon_1392              | COG4585 | Blon_1393          | COG2197 | hypothetical proteins                                        | unknown                                   |
| none                   | N/A     | Blon_2277          | COG2197 | hypothetical proteins                                        | unknown                                   |

<sup>1</sup>Pseudogene<sup>2</sup>Two phage integrases localized downstream
