# Supplementary material
Source: PubMed Central journal article supplement (PMC2596198)
Supplement: 0809584105_ST4_PDF.pdf [file 0809584105_ST4_PDF.pdf]

**Table S4. Loss of plant-derived sugar metabolism in *B. longum* subsp. *infantis* ATCC15697**

| Genome feature                                          | COG     | <i>B. longum</i> ssp. <i>infantis</i><br>ATCC15697 | <i>B. longum</i> ssp. <i>longum</i><br>NCC2705 | <i>B. adolescentis</i><br>ATCC15703 |
|---------------------------------------------------------|---------|----------------------------------------------------|------------------------------------------------|-------------------------------------|
| xylose isomerase ( <i>xylA</i> )                        | COG2115 | 0                                                  | 1                                              | 1                                   |
| $\alpha$ -xylosidase                                    | COG1501 | 0                                                  | 3                                              | 1                                   |
| $\beta$ -xylosidase                                     | COG3507 | 1                                                  | 5                                              | 5                                   |
| ABC-type xylose transport system, periplasmic component | COG4213 | 0                                                  | 1                                              | 1                                   |
| ABC-type xylose transport system, permease component    | COG4214 | 0                                                  | 2                                              | 0                                   |
| ATP binding protein of ABC transporter for pentoses     | COG1129 | 0                                                  | 3                                              | 0                                   |
| $\alpha$ -N-arabinofuranosidase                         | COG3940 | 0                                                  | 2                                              | 2                                   |
| $\alpha$ -L-arabinofuranosidase                         | COG3534 | 1                                                  | 5                                              | 2                                   |
| arabinose isomerase ( <i>araA</i> )                     | COG2160 | 0                                                  | 1                                              | 1                                   |
| L-ribulose-5-phosphate 4-epimerase ( <i>araD</i> )      | COG0235 | 0                                                  | 1                                              | 1                                   |
