# Supplementary material
Source: PubMed Central journal article supplement (PMC2596198)
Supplement: 0809584105_ST5_PDF.pdf [file 0809584105_ST5_PDF.pdf]

**Table S5. Genes unique to the *B. longum* subsp. *infantis* core genome**

| <b>Locus</b>                                                                                    | <b>Description</b>                             | <b>Length<br/>(bp)</b> | <b>JCM1272<sup>1</sup><br/>hits/bp gene</b> | <b>JCM11346<br/>hits/bp gene</b> |
|-------------------------------------------------------------------------------------------------|------------------------------------------------|------------------------|---------------------------------------------|----------------------------------|
| <b>Genes conserved in ATCC15697, JCM1272, and JCM11346 (unique to the <i>infantis</i> core)</b> |                                                |                        |                                             |                                  |
| Blon_0010                                                                                       | hypothetical protein                           | 225                    | 1.458                                       | 2.053                            |
| Blon_0012                                                                                       | addiction module toxin, RelE/StbE family       | 291                    | 1.986                                       | 1.564                            |
| Blon_0013                                                                                       | addiction module antitoxin, RelB/DinJ family   | 279                    | 1.710                                       | 1.215                            |
| Blon_0016                                                                                       | hypothetical protein                           | 261                    | 0.716                                       | 0.843                            |
| Blon_0017                                                                                       | hypothetical protein                           | 645                    | 1.836                                       | 1.491                            |
| Blon_0018                                                                                       | hypothetical protein                           | 276                    | 0.870                                       | 0.996                            |
| Blon_0023                                                                                       | phosphonate ABC transporter                    | 939                    | 1.147                                       | 0.858                            |
| Blon_0025                                                                                       | Haloacid dehalogenase domain protein hydrolase | 720                    | 0.708                                       | 0.639                            |
| Blon_0032                                                                                       | None                                           | 513                    | 1.096                                       | 1.240                            |
| Blon_0033                                                                                       | None                                           | 129                    | 1.023                                       | 1.000                            |
| Blon_0096                                                                                       | ThiJ/PfpI domain protein                       | 615                    | 1.761                                       | 1.408                            |
| Blon_0097                                                                                       | hypothetical protein                           | 321                    | 1.262                                       | 1.255                            |
| Blon_0100                                                                                       | None                                           | 207                    | 1.942                                       | 0.546                            |
| Blon_0109                                                                                       | high-affinity nickel-transporter               | 975                    | 1.282                                       | 0.941                            |
| Blon_0110                                                                                       | urease, gamma subunit                          | 699                    | 1.152                                       | 0.950                            |
| Blon_0111                                                                                       | urease, alpha subunit                          | 1722                   | 1.036                                       | 0.819                            |
| Blon_0112                                                                                       | UreE urease accessory domain protein           | 666                    | 1.105                                       | 0.635                            |
| Blon_0113                                                                                       | Urease accessory protein UreF                  | 822                    | 0.977                                       | 0.775                            |
| Blon_0114                                                                                       | urease accessory protein UreG                  | 612                    | 1.114                                       | 1.093                            |
| Blon_0115                                                                                       | Urease accessory protein UreD                  | 855                    | 0.933                                       | 0.874                            |
| Blon_0118                                                                                       | major facilitator superfamily MFS_1            | 1176                   | 1.097                                       | 0.772                            |
| Blon_0119                                                                                       | Uracil-DNA glycosylase superfamily             | 639                    | 0.762                                       | 0.700                            |
| Blon_0135                                                                                       | zinc finger, CHY domain protein                | 366                    | 1.590                                       | 1.522                            |
| Blon_0193                                                                                       | Predicted membrane protein                     | 849                    | 1.150                                       | 0.987                            |
| Blon_0212                                                                                       | hypothetical protein                           | 156                    | 0.936                                       | 1.404                            |
| Blon_0217                                                                                       | Ribbon-helix-helix protein, copG family.       | 285                    | 0.821                                       | 1.228                            |
| Blon_0221                                                                                       | hypothetical protein                           | 294                    | 2.310                                       | 1.983                            |
| Blon_0246                                                                                       | None                                           | 174                    | 2.046                                       | 0.264 <sup>2</sup>               |
| Blon_0248                                                                                       | Alpha-L-fucosidase                             | 1350                   | 2.138                                       | 1.123                            |
| Blon_0249                                                                                       | hypothetical protein                           | 249                    | 1.337                                       | 0.365                            |
| Blon_0256                                                                                       | hypothetical protein                           | 363                    | 1.132                                       | 0.920                            |
| Blon_0262                                                                                       | hypothetical protein                           | 315                    | 1.848                                       | 1.619                            |
| Blon_0287                                                                                       | hypothetical protein                           | 888                    | 0.545                                       | 0.676                            |
| Blon_0299                                                                                       | hypothetical protein                           | 132                    | 0.485                                       | 0.568                            |
| Blon_0300                                                                                       | hypothetical protein                           | 285                    | 0.856                                       | 0.681                            |
| Blon_0301                                                                                       | Uncharacterized protein conserved in bacteria  | 282                    | 0.780                                       | 0.777                            |
| Blon_0331                                                                                       | hypothetical protein                           | 210                    | 1.148                                       | 0.867                            |
| Blon_0332                                                                                       | hypothetical protein                           | 345                    | 1.380                                       | 0.867                            |
| Blon_0334                                                                                       | RelB antitoxin                                 | 324                    | 1.673                                       | 1.210                            |
| Blon_0344                                                                                       | Mandelate lactonizing enzyme                   | 630                    | 1.122                                       | 1.525                            |
| Blon_0346                                                                                       | Beta-galactosidase                             | 2025                   | 0.334                                       | 0.761                            |
| Blon_0348                                                                                       | Transposase and inactivated derivatives        | 600                    | 1.170                                       | 0.835                            |
| Blon_0379                                                                                       | HipA domain protein                            | 1218                   | 1.827                                       | 1.956                            |
| Blon_0380                                                                                       | helix-turn-helix domain protein                | 294                    | 1.592                                       | 1.827                            |
| Blon_0384                                                                                       | aminotransferase, class IV                     | 798                    | 0.701                                       | 0.449                            |
| Blon_0387                                                                                       | riboflavin synthase, alpha subunit             | 630                    | 0.930                                       | 0.817                            |
| Blon_0388                                                                                       | GTP cyclohydrolase II                          | 1206                   | 1.322                                       | 1.065                            |
| Blon_0389                                                                                       | Riboflavin synthase                            | 468                    | 1.297                                       | 1.237                            |
| Blon_0397                                                                                       | hypothetical protein                           | 279                    | 1.609                                       | 1.197                            |
| Blon_0410                                                                                       | transcriptional regulator, Fis family          | 843                    | 2.083                                       | 1.809                            |
| Blon_0419                                                                                       | binding-protein-dependent transport system     | 1785                   | 0.996                                       | 0.892                            |
| Blon_0426                                                                                       | Alpha-L-fucosidase                             | 1350                   | 2.143                                       | 1.216                            |
| Blon_0434                                                                                       | bacteriocin, lactococcin 972 family            | 408                    | 1.662                                       | 2.056                            |
| Blon_0435                                                                                       | hypothetical protein                           | 1953                   | 1.747                                       | 2.055                            |
| Blon_0437                                                                                       | hypothetical protein                           | 405                    | 2.242                                       | 2.277                            |
| Blon_0447                                                                                       | DNA primase, small subunit                     | 1089                   | 1.730                                       | 1.533                            |

|           |                                                              |      |       |       |
|-----------|--------------------------------------------------------------|------|-------|-------|
| Blon_0448 | hypothetical protein                                         | 1209 | 1.627 | 0.990 |
| Blon_0449 | Integrase, catalytic region                                  | 1077 | 0.734 | 0.649 |
| Blon_0450 | hypothetical protein                                         | 705  | 1.328 | 1.452 |
| Blon_0451 | hypothetical protein                                         | 645  | 1.453 | 1.360 |
| Blon_0452 | None                                                         | 123  | 3.203 | 3.610 |
| Blon_0453 | hypothetical protein                                         | 759  | 1.904 | 1.826 |
| Blon_0454 | hypothetical protein                                         | 705  | 0.372 | 0.274 |
| Blon_0456 | hypothetical protein                                         | 498  | 2.092 | 2.293 |
| Blon_0457 | hypothetical protein                                         | 348  | 2.451 | 2.040 |
| Blon_0476 | hypothetical protein                                         | 429  | 0.445 | 0.622 |
| Blon_0477 | hypothetical protein                                         | 273  | 1.190 | 1.421 |
| Blon_0478 | asparagine synthase                                          | 1590 | 1.326 | 1.720 |
| Blon_0479 | hypothetical protein                                         | 213  | 1.756 | 1.981 |
| Blon_0483 | TraG/TraD family.                                            | 270  | 0.633 | 1.996 |
| Blon_0484 | Uncharacterized membrane protein                             | 543  | 2.298 | 1.915 |
| Blon_0485 | hypothetical protein                                         | 546  | 1.095 | 1.357 |
| Blon_0518 | hypothetical protein                                         | 729  | 1.195 | 1.366 |
| Blon_0519 | hypothetical protein                                         | 627  | 1.523 | 1.407 |
| Blon_0527 | hypothetical protein                                         | 258  | 0.450 | 0.946 |
| Blon_0528 | hypothetical protein                                         | 435  | 0.667 | 1.028 |
| Blon_0529 | hypothetical protein                                         | 240  | 1.113 | 0.829 |
| Blon_0533 | hypothetical protein                                         | 156  | 0.712 | 0.571 |
| Blon_0534 | hypothetical protein                                         | 174  | 0.736 | 0.517 |
| Blon_0535 | hypothetical protein                                         | 279  | 1.151 | 0.935 |
| Blon_0536 | BetR domain.                                                 | 465  | 1.351 | 1.166 |
| Blon_0557 | None                                                         | 324  | 1.787 | 0.744 |
| Blon_0558 | major facilitator superfamily MFS_1                          | 1188 | 2.062 | 1.556 |
| Blon_0562 | transcriptional regulator, PadR-like family                  | 618  | 1.238 | 0.599 |
| Blon_0588 | hypothetical protein                                         | 420  | 1.271 | 0.767 |
| Blon_0606 | nucleoside 2-deoxyribosyltransferase                         | 429  | 1.797 | 1.457 |
| Blon_0609 | hypothetical protein                                         | 1173 | 1.123 | 0.989 |
| Blon_0615 | Resolvase, N-terminal domain                                 | 588  | 1.328 | 0.294 |
| Blon_0633 | hypothetical protein                                         | 666  | 0.973 | 1.116 |
| Blon_0634 | diguanylate cyclase/phosphodiesterase                        | 2169 | 1.055 | 0.948 |
| Blon_0642 | GntR domain protein                                          | 759  | 0.924 | 0.738 |
| Blon_0643 | hypothetical protein                                         | 912  | 0.854 | 0.500 |
| Blon_0645 | N-acylglucosamine-6-phosphate 2-epimerase                    | 684  | 0.792 | 0.539 |
| Blon_0646 | BNR repeat-containing protein                                | 2283 | 0.864 | 0.514 |
| Blon_0678 | None                                                         | 318  | 0.465 | 0.456 |
| Blon_0708 | Gram-positive signal peptide, YSIRK family                   | 306  | 1.373 | 1.186 |
| Blon_0750 | hypothetical protein                                         | 789  | 0.978 | 0.735 |
| Blon_0752 | hypothetical protein                                         | 1044 | 1.058 | 1.019 |
| Blon_0765 | hypothetical protein                                         | 222  | 0.910 | 0.689 |
| Blon_0766 | None                                                         | 343  | 1.251 | 0.942 |
| Blon_0772 | hypothetical protein                                         | 225  | 1.058 | 1.151 |
| Blon_0792 | hypothetical protein                                         | 615  | 1.332 | 1.537 |
| Blon_0864 | ISXoo15 transposase                                          | 456  | 1.518 | 2.294 |
| Blon_0886 | hypothetical protein                                         | 180  | 1.028 | 1.033 |
| Blon_0915 | major facilitator superfamily MFS_1                          | 1407 | 1.864 | 1.716 |
| Blon_0948 | hypothetical protein                                         | 300  | 0.847 | 0.873 |
| Blon_0953 | lipolytic enzyme, G-D-S-L family                             | 633  | 0.741 | 0.861 |
| Blon_0973 | hypothetical protein                                         | 405  | 1.284 | 1.558 |
| Blon_0974 | HipA domain protein                                          | 1314 | 0.557 | 0.342 |
| Blon_0984 | hypothetical protein                                         | 519  | 1.671 | 1.590 |
| Blon_0985 | Abi family protein                                           | 954  | 0.913 | 1.136 |
| Blon_0986 | hypothetical protein                                         | 450  | 0.764 | 0.651 |
| Blon_0987 | hypothetical protein                                         | 249  | 0.775 | 0.739 |
| Blon_0988 | major facilitator superfamily MFS_1                          | 1263 | 0.819 | 0.849 |
| Blon_0993 | hypothetical protein                                         | 243  | 1.132 | 0.222 |
| Blon_0994 | transcriptional regulator, Fis family                        | 1302 | 2.035 | 1.571 |
| Blon_0996 | bacteriocin-associated integral membrane (putative immunity) | 1956 | 1.419 | 0.956 |
| Blon_1000 | bacteriocin ABC transporter, permease protein subunit        | 744  | 1.402 | 1.606 |
| Blon_1001 | hypothetical protein                                         | 744  | 1.714 | 1.476 |

|           |                                                                     |      |       |       |
|-----------|---------------------------------------------------------------------|------|-------|-------|
| Blon_1002 | hypothetical protein                                                | 807  | 1.413 | 1.302 |
| Blon_1024 | Integrase, catalytic region                                         | 810  | 0.299 | 0.678 |
| Blon_1043 | hypothetical protein                                                | 840  | 0.625 | 0.576 |
| Blon_1044 | hypothetical protein                                                | 852  | 0.581 | 0.617 |
| Blon_1045 | hypothetical protein                                                | 489  | 0.687 | 0.607 |
| Blon_1046 | hypothetical protein                                                | 351  | 1.094 | 1.011 |
| Blon_1067 | Predicted membrane protein                                          | 954  | 1.062 | 1.000 |
| Blon_1068 | Predicted membrane protein                                          | 729  | 0.539 | 0.934 |
| Blon_1077 | hypothetical protein                                                | 246  | 0.663 | 0.650 |
| Blon_1171 | hypothetical protein                                                | 318  | 0.836 | 0.950 |
| Blon_1225 | Resolvase, N-terminal domain                                        | 483  | 0.992 | 0.433 |
| Blon_1226 | transposase, IS605 OrfB family                                      | 1323 | 0.702 | 0.447 |
| Blon_1356 | Integrase, catalytic region                                         | 1074 | 0.592 | 0.658 |
| Blon_1358 | ABC-type antimicrobial peptide,permease component                   | 1194 | 1.059 | 1.367 |
| Blon_1372 | Uncharacterized conserved protein, COG2135                          | 693  | 0.988 | 0.902 |
| Blon_1379 | Uncharacterized protein conserved in bacteria, COG4367              | 246  | 0.622 | 0.829 |
| Blon_1381 | ISXoo11 transposase                                                 | 246  | 2.801 | 1.390 |
| Blon_1382 | None                                                                | 326  | 1.344 | 1.380 |
| Blon_1383 | SSS sodium solute transporter superfamily                           | 1752 | 0.878 | 1.072 |
| Blon_1384 | hypothetical protein                                                | 342  | 0.877 | 1.137 |
| Blon_1388 | hypothetical protein                                                | 555  | 1.499 | 1.398 |
| Blon_1389 | hypothetical protein                                                | 321  | 0.667 | 0.474 |
| Blon_1402 | hypothetical protein                                                | 828  | 0.374 | 0.262 |
| Blon_1404 | hypothetical protein                                                | 783  | 0.436 | 0.294 |
| Blon_1406 | hypothetical protein                                                | 399  | 0.672 | 0.574 |
| Blon_1413 | None                                                                | 1234 | 1.673 | 0.523 |
| Blon_1428 | hypothetical protein                                                | 240  | 0.858 | 0.875 |
| Blon_1429 | Uncharacterized conserved protein, COG3189                          | 363  | 0.791 | 0.923 |
| Blon_1430 | hypothetical protein                                                | 318  | 0.619 | 0.896 |
| Blon_1432 | hypothetical protein                                                | 327  | 0.752 | 0.813 |
| Blon_1433 | hypothetical protein                                                | 402  | 0.639 | 0.786 |
| Blon_1436 | putative oxidoreductase                                             | 369  | 0.290 | 0.409 |
| Blon_1438 | putative helicase                                                   | 885  | 1.016 | 0.990 |
| Blon_1459 | hypothetical protein                                                | 264  | 0.716 | 0.640 |
| Blon_1466 | zinc finger, SWIM domain protein                                    | 2706 | 0.878 | 1.006 |
| Blon_1468 | MazG nucleotide pyrophosphohydrolase                                | 390  | 1.251 | 1.541 |
| Blon_1469 | Dehydrogenases with different specificities (related to short-chain | 240  | 1.125 | 1.058 |
| Blon_1470 | zinc finger, SWIM domain protein                                    | 489  | 1.534 | 1.869 |
| Blon_1578 | NAD/NADP transhydrogenase alpha subunit-like                        | 306  | 1.013 | 1.088 |
| Blon_1599 | peptidase A24A, prepilin type IV                                    | 474  | 1.143 | 1.209 |
| Blon_1603 | hypothetical protein                                                | 237  | 0.852 | 1.008 |
| Blon_1606 | RelB antitoxin                                                      | 294  | 1.150 | 1.296 |
| Blon_1607 | transcriptional modulator of MazE/toxin, MazF                       | 354  | 0.785 | 0.862 |
| Blon_1608 | transglutaminase domain protein                                     | 603  | 1.818 | 1.982 |
| Blon_1609 | hypothetical protein                                                | 357  | 1.356 | 1.398 |
| Blon_1610 | cytidine deaminase                                                  | 441  | 1.077 | 1.034 |
| Blon_1623 | peptidase S51, dipeptidase E                                        | 624  | 0.622 | 0.577 |
| Blon_1624 | hypothetical protein                                                | 1158 | 0.835 | 0.682 |
| Blon_1626 | DNA binding domain, excisionase family                              | 531  | 1.124 | 1.090 |
| Blon_1627 | hypothetical protein                                                | 588  | 1.272 | 1.425 |
| Blon_1638 | None                                                                | 300  | 0.813 | 0.403 |
| Blon_1639 | None                                                                | 234  | 0.615 | 0.581 |
| Blon_1662 | Integrase, catalytic region                                         | 1107 | 1.498 | 1.711 |
| Blon_1676 | hypothetical protein                                                | 393  | 0.382 | 0.402 |
| Blon_1677 | HipA-like C-terminal domain.                                        | 1257 | 0.866 | 0.842 |
| Blon_1678 | RelB antitoxin                                                      | 252  | 1.111 | 1.036 |
| Blon_1681 | Methyltransferase type 11                                           | 870  | 0.303 | 0.898 |
| Blon_1684 | hypothetical protein                                                | 306  | 0.598 | 1.490 |
| Blon_1687 | TfoX, C-terminal domain protein                                     | 243  | 1.103 | 1.844 |
| Blon_1709 | hypothetical protein                                                | 381  | 0.898 | 0.672 |
| Blon_1750 | bacteriocin, lactococcin 972 family                                 | 447  | 1.244 | 1.642 |
| Blon_1751 | hypothetical protein                                                | 1971 | 1.618 | 1.976 |
| Blon_1840 | PilT protein domain protein                                         | 447  | 1.353 | 1.154 |

|           |                                                |      |       |       |
|-----------|------------------------------------------------|------|-------|-------|
| Blon_1859 | ExsB family protein                            | 756  | 2.135 | 2.132 |
| Blon_1898 | transcriptional regulator, PadR-like family    | 546  | 1.132 | 1.194 |
| Blon_1914 | transposase IS116/IS110/IS902 family protein   | 1182 | 0.671 | 0.286 |
| Blon_1919 | hypothetical protein                           | 489  | 0.937 | 0.845 |
| Blon_1928 | transposase IS116/IS110/IS902 family protein   | 1266 | 0.793 | 0.780 |
| Blon_1944 | hypothetical protein                           | 660  | 1.077 | 0.809 |
| Blon_1947 | transcriptional regulator                      | 294  | 1.262 | 1.041 |
| Blon_1950 | hypothetical protein                           | 219  | 0.548 | 0.717 |
| Blon_1971 | putative high-affinity zinc ABC transporter    | 438  | 0.934 | 0.696 |
| Blon_1972 | permease                                       | 1128 | 0.912 | 0.746 |
| Blon_1973 | hypothetical protein                           | 756  | 0.922 | 0.704 |
| Blon_1975 | hypothetical protein                           | 348  | 1.198 | 0.940 |
| Blon_1976 | hypothetical protein                           | 243  | 0.741 | 0.679 |
| Blon_1990 | hypothetical protein                           | 315  | 0.914 | 0.851 |
| Blon_2005 | hypothetical protein                           | 303  | 1.010 | 0.680 |
| Blon_2079 | transcriptional regulator, XRE family          | 564  | 1.672 | 1.759 |
| Blon_2086 | transcriptional regulator, Fis family          | 1188 | 1.910 | 1.562 |
| Blon_2097 | transposase IS116/IS110/IS902 family protein   | 1266 | 0.781 | 0.764 |
| Blon_2111 | hypothetical protein                           | 471  | 0.588 | 0.408 |
| Blon_2115 | hypothetical protein                           | 243  | 1.021 | 0.638 |
| Blon_2118 | hypothetical protein                           | 339  | 2.097 | 2.133 |
| Blon_2125 | Protein of unknown function (DUF797).          | 204  | 0.980 | 1.054 |
| Blon_2189 | hypothetical protein                           | 174  | 0.793 | 0.764 |
| Blon_2239 | Acetolactate decarboxylase                     | 768  | 1.345 | 1.173 |
| Blon_2261 | putative regulatory protein, FmdB family       | 186  | 1.608 | 1.710 |
| Blon_2263 | hypothetical protein                           | 201  | 1.010 | 1.224 |
| Blon_2274 | hypothetical protein                           | 660  | 2.209 | 1.908 |
| Blon_2278 | hypothetical protein                           | 174  | 1.770 | 2.075 |
| Blon_2279 | Integrase, catalytic region                    | 759  | 0.702 | 0.659 |
| Blon_2281 | hypothetical protein                           | 555  | 2.553 | 2.429 |
| Blon_2305 | RbsD or FucU transport                         | 447  | 1.291 | 1.177 |
| Blon_2306 | amidohydrolase 2                               | 768  | 1.043 | 1.272 |
| Blon_2307 | major facilitator superfamily MFS_1            | 1284 | 1.322 | 1.188 |
| Blon_2309 | Mandelate lactonizing enzyme                   | 1284 | 1.245 | 1.249 |
| Blon_2335 | hypothetical protein                           | 2349 | 0.813 | 0.877 |
| Blon_2336 | alpha-1,3/4-fucosidase, putative               | 1437 | 1.072 | 0.798 |
| Blon_2337 | RbsD or FucU transport                         | 438  | 1.386 | 1.297 |
| Blon_2340 | Mandelate lactonizing enzyme                   | 1278 | 1.164 | 1.267 |
| Blon_2348 | Exo-alpha-sialidase                            | 1185 | 1.003 | 0.644 |
| Blon_2353 | hypothetical protein                           | 123  | 1.138 | 1.358 |
| Blon_2356 | Haloacid dehalogenase domain protein hydrolase | 741  | 0.727 | 0.702 |
| Blon_2358 | beta-lactamase domain protein                  | 1320 | 1.201 | 1.226 |
| Blon_2362 | Uncharacterized conserved protein, COG4283     | 522  | 1.134 | 1.222 |
| Blon_2425 | hypothetical protein                           | 297  | 0.966 | 0.721 |
| Blon_2446 | hypothetical protein                           | 378  | 1.045 | 0.913 |
| Blon_2450 | hypothetical protein                           | 207  | 1.870 | 1.280 |
| Blon_2454 | hypothetical protein                           | 612  | 1.297 | 1.131 |
| Blon_2468 | glycosyl hydrolase, family 20                  | 1638 | 2.048 | 1.622 |
| Blon_2471 | PTS system, N-acetylglucosamine-specific IIBC  | 1539 | 1.173 | 0.782 |

#### Genes exclusive to ATCC15697

|           |                                                     |      |       |       |
|-----------|-----------------------------------------------------|------|-------|-------|
| Blon_0490 | hypothetical protein                                | 672  | 0.000 | 0.000 |
| Blon_0492 | hypothetical protein                                | 1695 | 0.000 | 0.000 |
| Blon_0494 | flavodoxin/nitric oxide synthase                    | 465  | 0.000 | 0.000 |
| Blon_0496 | phosphoribosylglycinamide synthetase                | 1203 | 0.000 | 0.000 |
| Blon_0520 | hypothetical protein                                | 720  | 0.000 | 0.000 |
| Blon_0521 | Lanthionine synthetase C family protein             | 1206 | 0.000 | 0.000 |
| Blon_0523 | ABC-2 type transporter                              | 672  | 0.000 | 0.000 |
| Blon_0657 | type I phosphodiesterase/nucleotide pyrophosphatase | 828  | 0.000 | 0.000 |
| Blon_0809 | ATP-dependent nuclease subunit B-like               | 3306 | 0.000 | 0.001 |
| Blon_0812 | hypothetical protein                                | 1287 | 0.000 | 0.002 |
| Blon_0813 | hypothetical protein                                | 339  | 0.000 | 0.000 |
| Blon_1099 | hypothetical protein                                | 261  | 0.000 | 0.004 |

|           |                                               |      |       |       |
|-----------|-----------------------------------------------|------|-------|-------|
| Blon_1100 | glycoside hydrolase, family 25                | 1245 | 0.000 | 0.001 |
| Blon_1101 | hypothetical protein                          | 381  | 0.000 | 0.000 |
| Blon_1102 | hypothetical protein                          | 294  | 0.000 | 0.000 |
| Blon_1104 | hypothetical protein                          | 1221 | 0.000 | 0.000 |
| Blon_1105 | hypothetical protein                          | 900  | 0.000 | 0.000 |
| Blon_1106 | hypothetical protein                          | 900  | 0.000 | 0.000 |
| Blon_1107 | phage tail tape measure protein, TP901 family | 3354 | 0.000 | 0.000 |
| Blon_1108 | hypothetical protein                          | 297  | 0.000 | 0.000 |
| Blon_1109 | hypothetical protein                          | 495  | 0.000 | 0.000 |
| Blon_1110 | hypothetical protein                          | 243  | 0.000 | 0.000 |
| Blon_1111 | hypothetical protein                          | 537  | 0.000 | 0.000 |
| Blon_1112 | hypothetical protein                          | 408  | 0.000 | 0.000 |
| Blon_1113 | hypothetical protein                          | 390  | 0.000 | 0.000 |
| Blon_1114 | hypothetical protein                          | 372  | 0.000 | 0.000 |
| Blon_1115 | hypothetical protein                          | 420  | 0.000 | 0.000 |
| Blon_1116 | phage major capsid protein, HK97              | 888  | 0.000 | 0.000 |
| Blon_1117 | hypothetical protein                          | 669  | 0.000 | 0.000 |
| Blon_1118 | hypothetical protein                          | 870  | 0.000 | 0.000 |
| Blon_1119 | Protein of unknown function (DUF1483).        | 1434 | 0.000 | 0.000 |
| Blon_1120 | hypothetical protein                          | 1620 | 0.000 | 0.001 |
| Blon_1121 | hypothetical protein                          | 537  | 0.000 | 0.000 |
| Blon_1122 | hypothetical protein                          | 495  | 0.000 | 0.000 |
| Blon_1123 | hypothetical protein                          | 777  | 0.000 | 0.000 |
| Blon_1124 | hypothetical protein                          | 513  | 0.000 | 0.000 |
| Blon_1125 | hypothetical protein                          | 243  | 0.000 | 0.000 |
| Blon_1126 | hypothetical protein                          | 186  | 0.000 | 0.000 |
| Blon_1127 | hypothetical protein                          | 375  | 0.000 | 0.000 |
| Blon_1128 | pancreatic ribonuclease                       | 2283 | 0.000 | 0.000 |
| Blon_1129 | hypothetical protein                          | 177  | 0.000 | 0.000 |
| Blon_1130 | hypothetical protein                          | 825  | 0.000 | 0.000 |
| Blon_1131 | hypothetical protein                          | 933  | 0.000 | 0.000 |
| Blon_1132 | hypothetical protein                          | 399  | 0.000 | 0.000 |
| Blon_1133 | hypothetical protein                          | 384  | 0.003 | 0.000 |
| Blon_1134 | hypothetical protein                          | 330  | 0.000 | 0.000 |
| Blon_1135 | endodeoxyribonuclease RusA                    | 429  | 0.000 | 0.000 |
| Blon_1136 | hypothetical protein                          | 264  | 0.000 | 0.000 |
| Blon_1137 | hypothetical protein                          | 342  | 0.000 | 0.000 |
| Blon_1138 | hypothetical protein                          | 234  | 0.000 | 0.000 |
| Blon_1139 | hypothetical protein                          | 279  | 0.000 | 0.000 |
| Blon_1140 | hypothetical protein                          | 810  | 0.000 | 0.000 |
| Blon_1141 | hypothetical protein                          | 303  | 0.000 | 0.000 |
| Blon_1142 | hypothetical protein                          | 279  | 0.000 | 0.000 |
| Blon_1143 | hypothetical protein                          | 396  | 0.003 | 0.000 |
| Blon_1144 | Domain of unknown function (DUF955).          | 324  | 0.000 | 0.000 |
| Blon_1146 | Molecular chaperone, HSP90 family             | 2055 | 0.000 | 0.000 |
| Blon_1147 | hypothetical protein                          | 690  | 0.000 | 0.000 |
| Blon_1148 | hypothetical protein                          | 618  | 0.000 | 0.000 |
| Blon_1175 | DNA binding domain, excisionase family        | 234  | 0.000 | 0.000 |
| Blon_1176 | hypothetical protein                          | 249  | 0.000 | 0.000 |
| Blon_1178 | hypothetical protein                          | 417  | 0.000 | 0.000 |
| Blon_1179 | transposase, IS605 OrfB family                | 1323 | 0.000 | 0.000 |
| Blon_1180 | hypothetical protein                          | 579  | 0.000 | 0.000 |
| Blon_1181 | hypothetical protein                          | 1065 | 0.000 | 0.000 |
| Blon_1182 | LigA                                          | 876  | 0.000 | 0.000 |
| Blon_1183 | hypothetical protein                          | 282  | 0.000 | 0.000 |
| Blon_1184 | LPXTG-motif cell wall anchor domain           | 2412 | 0.000 | 0.000 |
| Blon_1185 | leucine rich repeat variant                   | 420  | 0.000 | 0.000 |
| Blon_1186 | VRR-NUC domain.                               | 291  | 0.000 | 0.000 |
| Blon_1187 | hypothetical protein                          | 459  | 0.000 | 0.000 |
| Blon_1188 | hypothetical protein                          | 213  | 0.000 | 0.000 |
| Blon_1189 | hypothetical protein                          | 828  | 0.000 | 0.000 |
| Blon_1190 | hypothetical protein                          | 411  | 0.000 | 0.000 |
| Blon_1191 | hypothetical protein                          | 747  | 0.000 | 0.000 |

|           |                                          |      |       |       |
|-----------|------------------------------------------|------|-------|-------|
| Blon_1192 | hypothetical protein                     | 429  | 0.000 | 0.000 |
| Blon_1193 | hypothetical protein                     | 1881 | 0.000 | 0.000 |
| Blon_1194 | hypothetical protein                     | 1314 | 0.000 | 0.000 |
| Blon_1195 | transposase, IS605 OrfB                  | 1458 | 0.000 | 0.000 |
| Blon_1196 | None                                     | 243  | 0.000 | 0.000 |
| Blon_1197 | adenine-specific methyltransferase EcoRI | 681  | 0.000 | 0.000 |
| Blon_1198 | hypothetical protein                     | 774  | 0.000 | 0.000 |
| Blon_1199 | hypothetical protein                     | 342  | 0.000 | 0.000 |
| Blon_1200 | N-formylglutamate amidohydrolase         | 918  | 0.000 | 0.000 |
| Blon_1202 | hypothetical protein                     | 870  | 0.000 | 0.000 |
| Blon_1203 | hypothetical protein                     | 180  | 0.000 | 0.000 |
| Blon_1205 | hypothetical protein                     | 1014 | 0.000 | 0.000 |
| Blon_1206 | hypothetical protein                     | 354  | 0.000 | 0.000 |
| Blon_1207 | hypothetical protein                     | 396  | 0.000 | 0.000 |
| Blon_1208 | hypothetical protein                     | 2943 | 0.000 | 0.000 |
| Blon_1209 | hypothetical protein                     | 762  | 0.000 | 0.000 |
| Blon_1210 | HNH endonuclease.                        | 702  | 0.000 | 0.000 |
| Blon_1211 | hypothetical protein                     | 387  | 0.000 | 0.000 |
| Blon_1212 | hypothetical protein                     | 669  | 0.000 | 0.000 |
| Blon_1213 | hypothetical protein                     | 459  | 0.000 | 0.000 |
| Blon_1214 | transcriptional regulator, XRE family    | 552  | 0.000 | 0.000 |
| Blon_1215 | DNA methylase N-4/N-6 domain protein     | 1317 | 0.000 | 0.000 |
| Blon_1216 | hypothetical protein                     | 525  | 0.000 | 0.000 |
| Blon_1217 | hypothetical protein                     | 1083 | 0.000 | 0.000 |
| Blon_1218 | hypothetical protein                     | 564  | 0.000 | 0.000 |
| Blon_1219 | hypothetical protein                     | 498  | 0.000 | 0.000 |
| Blon_1220 | hypothetical protein                     | 984  | 0.000 | 0.000 |
| Blon_1222 | hypothetical protein                     | 918  | 0.000 | 0.000 |
| Blon_1224 | hypothetical protein                     | 375  | 0.000 | 0.000 |
| Blon_1231 | hypothetical protein                     | 327  | 0.083 | 0.070 |
| Blon_1234 | hypothetical protein                     | 684  | 0.001 | 0.000 |
| Blon_1235 | hypothetical protein                     | 402  | 0.000 | 0.000 |
| Blon_1236 | hypothetical protein                     | 324  | 0.000 | 0.000 |
| Blon_1238 | transcriptional regulator, XRE family    | 576  | 0.000 | 0.000 |
| Blon_1242 | hypothetical protein                     | 4149 | 0.000 | 0.000 |
| Blon_1243 | hypothetical protein                     | 261  | 0.000 | 0.000 |
| Blon_1244 | hypothetical protein                     | 1317 | 0.000 | 0.000 |
| Blon_1245 | hypothetical protein                     | 807  | 0.000 | 0.000 |
| Blon_1246 | CHAP domain containing protein           | 1272 | 0.000 | 0.000 |
| Blon_1247 | hypothetical protein                     | 276  | 0.000 | 0.000 |
| Blon_1248 | hypothetical protein                     | 663  | 0.000 | 0.000 |
| Blon_1250 | hypothetical protein                     | 2370 | 0.000 | 0.000 |
| Blon_1251 | hypothetical protein                     | 906  | 0.000 | 0.000 |
| Blon_1252 | hypothetical protein                     | 411  | 0.000 | 0.000 |
| Blon_1253 | hypothetical protein                     | 792  | 0.000 | 0.000 |
| Blon_1254 | hypothetical protein                     | 591  | 0.000 | 0.000 |
| Blon_1255 | hypothetical protein                     | 1665 | 0.000 | 0.000 |
| Blon_1256 | hypothetical protein                     | 294  | 0.000 | 0.000 |
| Blon_1257 | hypothetical protein                     | 1275 | 0.000 | 0.000 |
| Blon_1258 | cell divisionFtsK/SpoIIIE                | 3297 | 0.000 | 0.000 |
| Blon_1262 | hypothetical protein                     | 684  | 0.000 | 0.000 |
| Blon_1263 | Helicase superfamily 3                   | 2514 | 0.000 | 0.000 |
| Blon_1264 | hypothetical protein                     | 249  | 0.000 | 0.000 |
| Blon_1267 | hypothetical protein                     | 384  | 0.000 | 0.000 |
| Blon_1268 | hypothetical protein                     | 456  | 0.000 | 0.000 |
| Blon_1270 | hypothetical protein                     | 294  | 0.000 | 0.000 |
| Blon_1271 | hypothetical protein                     | 327  | 0.000 | 0.000 |
| Blon_1272 | hypothetical protein                     | 306  | 0.000 | 0.000 |
| Blon_1273 | hypothetical protein                     | 531  | 0.000 | 0.000 |
| Blon_1274 | hypothetical protein                     | 267  | 0.000 | 0.000 |
| Blon_1275 | hypothetical protein                     | 291  | 0.000 | 0.000 |
| Blon_1276 | hypothetical protein                     | 1011 | 0.000 | 0.000 |
| Blon_1277 | hypothetical protein                     | 612  | 0.000 | 0.000 |

|           |                                                  |      |       |       |
|-----------|--------------------------------------------------|------|-------|-------|
| Blon_1278 | hypothetical protein                             | 567  | 0.000 | 0.000 |
| Blon_1279 | hypothetical protein                             | 615  | 0.000 | 0.000 |
| Blon_1281 | hypothetical protein                             | 540  | 0.000 | 0.000 |
| Blon_1282 | hypothetical protein                             | 303  | 0.000 | 0.000 |
| Blon_1283 | hypothetical protein                             | 363  | 0.000 | 0.000 |
| Blon_1285 | hypothetical protein                             | 507  | 0.000 | 0.000 |
| Blon_1286 | hypothetical protein                             | 225  | 0.000 | 0.000 |
| Blon_1287 | hypothetical protein                             | 597  | 0.000 | 0.000 |
| Blon_1288 | metallophosphoesterase                           | 738  | 0.000 | 0.000 |
| Blon_1289 | hypothetical protein                             | 360  | 0.000 | 0.000 |
| Blon_1290 | hypothetical protein                             | 519  | 0.000 | 0.000 |
| Blon_1291 | hypothetical protein                             | 408  | 0.000 | 0.000 |
| Blon_1292 | hypothetical protein                             | 537  | 0.000 | 0.000 |
| Blon_1293 | hypothetical protein                             | 489  | 0.000 | 0.000 |
| Blon_1294 | hypothetical protein                             | 300  | 0.000 | 0.000 |
| Blon_1295 | hypothetical protein                             | 423  | 0.000 | 0.000 |
| Blon_1296 | hypothetical protein                             | 219  | 0.000 | 0.000 |
| Blon_1297 | hypothetical protein                             | 366  | 0.000 | 0.000 |
| Blon_1298 | RNA ligase, DRB0094 family                       | 864  | 0.000 | 0.000 |
| Blon_1299 | hypothetical protein                             | 177  | 0.000 | 0.000 |
| Blon_1300 | hypothetical protein                             | 816  | 0.000 | 0.000 |
| Blon_1301 | hypothetical protein                             | 552  | 0.000 | 0.000 |
| Blon_1302 | hypothetical protein                             | 243  | 0.000 | 0.000 |
| Blon_1304 | hypothetical protein                             | 273  | 0.000 | 0.000 |
| Blon_1305 | hypothetical protein                             | 177  | 0.000 | 0.000 |
| Blon_1306 | hypothetical protein                             | 258  | 0.000 | 0.000 |
| Blon_1307 | transposase IS200-family protein                 | 399  | 0.070 | 0.000 |
| Blon_1308 | putative transposase, IS891/IS1136/IS1341 family | 1146 | 0.000 | 0.000 |
| Blon_1309 | hypothetical protein                             | 333  | 0.000 | 0.000 |
| Blon_1310 | hypothetical protein                             | 276  | 0.000 | 0.000 |
| Blon_1311 | hypothetical protein                             | 828  | 0.000 | 0.000 |
| Blon_1312 | hypothetical protein                             | 336  | 0.000 | 0.000 |
| Blon_1313 | hypothetical protein                             | 681  | 0.000 | 0.000 |
| Blon_1314 | hypothetical protein                             | 444  | 0.000 | 0.000 |
| Blon_1315 | transposase, IS605 OrfB family                   | 1230 | 0.000 | 0.000 |
| Blon_1316 | hypothetical protein                             | 1326 | 0.000 | 0.000 |
| Blon_1317 | hypothetical protein                             | 255  | 0.000 | 0.000 |
| Blon_1318 | hypothetical protein                             | 333  | 0.000 | 0.000 |
| Blon_1319 | hypothetical protein                             | 1353 | 0.000 | 0.000 |
| Blon_1320 | hypothetical protein                             | 1050 | 0.000 | 0.000 |
| Blon_1321 | hypothetical protein                             | 309  | 0.000 | 0.000 |
| Blon_1322 | hypothetical protein                             | 204  | 0.000 | 0.005 |
| Blon_1323 | hypothetical protein                             | 471  | 0.000 | 0.059 |
| Blon_1324 | putative DNA methyltransferase                   | 2799 | 0.000 | 0.129 |
| Blon_1325 | hypothetical protein                             | 393  | 0.000 | 0.135 |
| Blon_1326 | hypothetical protein                             | 411  | 0.000 | 0.000 |
| Blon_1327 | hypothetical protein                             | 384  | 0.000 | 0.000 |
| Blon_1328 | hypothetical protein                             | 348  | 0.000 | 0.000 |
| Blon_1329 | hypothetical protein                             | 540  | 0.000 | 0.000 |
| Blon_1330 | hypothetical protein                             | 366  | 0.000 | 0.000 |
| Blon_1331 | hypothetical protein                             | 351  | 0.000 | 0.000 |
| Blon_1332 | hypothetical protein                             | 312  | 0.000 | 0.000 |
| Blon_1333 | hypothetical protein                             | 474  | 0.000 | 0.000 |
| Blon_1334 | hypothetical protein                             | 642  | 0.000 | 0.000 |
| Blon_1335 | hypothetical protein                             | 198  | 0.000 | 0.000 |
| Blon_1336 | hypothetical protein                             | 468  | 0.000 | 0.000 |
| Blon_1337 | hypothetical protein                             | 288  | 0.000 | 0.000 |
| Blon_1338 | putative transcriptional regulator, XRE family   | 309  | 0.000 | 0.000 |
| Blon_1340 | hypothetical protein                             | 432  | 0.000 | 0.000 |
| Blon_1341 | hypothetical protein                             | 285  | 0.000 | 0.000 |
| Blon_1342 | hypothetical protein                             | 537  | 0.000 | 0.002 |
| Blon_1343 | hypothetical protein                             | 363  | 0.000 | 0.000 |
| Blon_1344 | hypothetical protein                             | 582  | 0.000 | 0.000 |

|           |                                                   |      |       |       |
|-----------|---------------------------------------------------|------|-------|-------|
| Blon_1345 | hypothetical protein                              | 282  | 0.000 | 0.000 |
| Blon_1346 | DNA methylase N-4/N-6 domain protein              | 1119 | 0.000 | 0.000 |
| Blon_1347 | hypothetical protein                              | 396  | 0.000 | 0.000 |
| Blon_1350 | transposase, IS605 OrfB family                    | 1461 | 0.000 | 0.000 |
| Blon_1351 | hypothetical protein                              | 309  | 0.000 | 0.000 |
| Blon_1352 | hypothetical protein                              | 207  | 0.000 | 0.000 |
| Blon_1354 | hypothetical protein                              | 303  | 0.000 | 0.043 |
| Blon_1355 | hypothetical protein                              | 123  | 0.000 | 0.122 |
| Blon_1394 | hypothetical protein                              | 513  | 0.000 | 0.002 |
| Blon_1395 | hypothetical protein                              | 837  | 0.000 | 0.147 |
| Blon_1403 | hypothetical protein                              | 627  | 0.123 | 0.062 |
| Blon_1407 | hypothetical protein                              | 363  | 0.000 | 0.000 |
| Blon_1409 | hypothetical protein                              | 624  | 0.037 | 0.022 |
| Blon_1410 | hypothetical protein                              | 729  | 0.081 | 0.041 |
| Blon_1418 | hypothetical protein                              | 534  | 0.000 | 0.000 |
| Blon_1419 | hypothetical protein                              | 303  | 0.000 | 0.003 |
| Blon_1420 | hypothetical protein                              | 345  | 0.000 | 0.009 |
| Blon_1421 | putative transcriptional regulator, MerR family   | 414  | 0.000 | 0.184 |
| Blon_1464 | zinc finger, SWIM domain protein                  | 1923 | 0.000 | 0.000 |
| Blon_1491 | Uncharacterized phage-associated protein, COG3600 | 438  | 0.000 | 0.000 |
| Blon_1492 | hypothetical protein                              | 504  | 0.000 | 0.000 |
| Blon_1493 | hypothetical protein                              | 621  | 0.000 | 0.000 |
| Blon_1494 | hypothetical protein                              | 303  | 0.000 | 0.000 |
| Blon_1495 | hypothetical protein                              | 363  | 0.000 | 0.000 |
| Blon_1496 | helix-turn-helix domain protein                   | 363  | 0.000 | 0.000 |
| Blon_1497 | hypothetical protein                              | 294  | 0.000 | 0.000 |
| Blon_1498 | hypothetical protein                              | 216  | 0.000 | 0.000 |
| Blon_1499 | hypothetical protein                              | 366  | 0.000 | 0.000 |
| Blon_1500 | hypothetical protein                              | 354  | 0.000 | 0.000 |
| Blon_1501 | hypothetical protein                              | 279  | 0.000 | 0.000 |
| Blon_1502 | hypothetical protein                              | 852  | 0.000 | 0.000 |
| Blon_1503 | ERF superfamily.                                  | 585  | 0.000 | 0.000 |
| Blon_1504 | hypothetical protein                              | 897  | 0.000 | 0.000 |
| Blon_1506 | hypothetical protein                              | 354  | 0.000 | 0.000 |
| Blon_1507 | hypothetical protein                              | 942  | 0.000 | 0.000 |
| Blon_1508 | hypothetical protein                              | 534  | 0.000 | 0.000 |
| Blon_1509 | hypothetical protein                              | 363  | 0.000 | 0.000 |
| Blon_1510 | hypothetical protein                              | 246  | 0.000 | 0.000 |
| Blon_1511 | hypothetical protein                              | 513  | 0.000 | 0.000 |
| Blon_1512 | hypothetical protein                              | 288  | 0.000 | 0.000 |
| Blon_1513 | hypothetical protein                              | 285  | 0.000 | 0.000 |
| Blon_1514 | hypothetical protein                              | 165  | 0.000 | 0.000 |
| Blon_1515 | hypothetical protein                              | 210  | 0.000 | 0.000 |
| Blon_1517 | hypothetical protein                              | 291  | 0.000 | 0.000 |
| Blon_1518 | hypothetical protein                              | 393  | 0.000 | 0.000 |
| Blon_1519 | hypothetical protein                              | 372  | 0.000 | 0.000 |
| Blon_1520 | hypothetical protein                              | 276  | 0.000 | 0.000 |
| Blon_1521 | hypothetical protein                              | 240  | 0.000 | 0.000 |
| Blon_1522 | hypothetical protein                              | 879  | 0.000 | 0.000 |
| Blon_1523 | hypothetical protein                              | 462  | 0.000 | 0.000 |
| Blon_1524 | hypothetical protein                              | 912  | 0.000 | 0.000 |
| Blon_1525 | Prophage antirepressor                            | 336  | 0.000 | 0.000 |
| Blon_1528 | phage antirepressor protein                       | 780  | 0.000 | 0.000 |
| Blon_1529 | hypothetical protein                              | 258  | 0.000 | 0.000 |
| Blon_1530 | hypothetical protein                              | 492  | 0.000 | 0.000 |
| Blon_1531 | None                                              | 327  | 0.000 | 0.000 |
| Blon_1532 | hypothetical protein                              | 261  | 0.000 | 0.000 |
| Blon_1533 | hypothetical protein                              | 345  | 0.000 | 0.000 |
| Blon_1534 | hypothetical protein                              | 372  | 0.000 | 0.000 |
| Blon_1536 | hypothetical protein                              | 546  | 0.000 | 0.000 |
| Blon_1537 | hypothetical protein                              | 369  | 0.019 | 0.000 |
| Blon_1538 | addiction module antitoxin, RelB/DinJ family      | 285  | 0.000 | 0.000 |
| Blon_1539 | hypothetical protein                              | 300  | 0.000 | 0.000 |



|           |                                            |      |       |       |
|-----------|--------------------------------------------|------|-------|-------|
| Blon_1540 | hypothetical protein                       | 342  | 0.000 | 0.000 |
| Blon_1541 | hypothetical protein                       | 786  | 0.000 | 0.000 |
| Blon_1542 | hypothetical protein                       | 342  | 0.000 | 0.000 |
| Blon_1543 | hypothetical protein                       | 342  | 0.000 | 0.000 |
| Blon_1544 | hypothetical protein                       | 243  | 0.000 | 0.000 |
| Blon_1545 | Cpl-7 lysozyme, C-terminal domain protein  | 615  | 0.000 | 0.000 |
| Blon_1546 | HNH endonuclease                           | 384  | 0.000 | 0.000 |
| Blon_1547 | hypothetical protein                       | 480  | 0.000 | 0.000 |
| Blon_1548 | hypothetical protein                       | 1899 | 0.000 | 0.000 |
| Blon_1549 | hypothetical protein                       | 1623 | 0.000 | 0.000 |
| Blon_1550 | hypothetical protein                       | 1077 | 0.000 | 0.000 |
| Blon_1551 | hypothetical protein                       | 636  | 0.000 | 0.000 |
| Blon_1552 | hypothetical protein                       | 795  | 0.000 | 0.000 |
| Blon_1553 | hypothetical protein                       | 1071 | 0.000 | 0.000 |
| Blon_1554 | hypothetical protein                       | 432  | 0.000 | 0.000 |
| Blon_1555 | hypothetical protein                       | 564  | 0.000 | 0.000 |
| Blon_1556 | hypothetical protein                       | 306  | 0.000 | 0.000 |
| Blon_1557 | hypothetical protein                       | 459  | 0.000 | 0.000 |
| Blon_1558 | hypothetical protein                       | 606  | 0.000 | 0.000 |
| Blon_1559 | hypothetical protein                       | 423  | 0.000 | 0.000 |
| Blon_1560 | hypothetical protein                       | 351  | 0.000 | 0.000 |
| Blon_1562 | hypothetical protein                       | 951  | 0.000 | 0.000 |
| Blon_1564 | hypothetical protein                       | 573  | 0.000 | 0.000 |
| Blon_1565 | hypothetical protein                       | 171  | 0.000 | 0.000 |
| Blon_1566 | hypothetical protein                       | 501  | 0.066 | 0.040 |
| Blon_1568 | hypothetical protein                       | 510  | 0.000 | 0.000 |
| Blon_1569 | hypothetical protein                       | 456  | 0.000 | 0.000 |
| Blon_1570 | hypothetical protein                       | 396  | 0.000 | 0.000 |
| Blon_1571 | glycoside hydrolase, family 25             | 1233 | 0.010 | 0.000 |
| Blon_1572 | hypothetical protein                       | 267  | 0.000 | 0.000 |
| Blon_1573 | hypothetical protein                       | 495  | 0.000 | 0.000 |
| Blon_1654 | glycoside hydrolase, family 25             | 1119 | 0.079 | 0.001 |
| Blon_1655 | hypothetical protein                       | 900  | 0.004 | 0.000 |
| Blon_1656 | hypothetical protein                       | 606  | 0.000 | 0.002 |
| Blon_1657 | hypothetical protein                       | 387  | 0.000 | 0.003 |
| Blon_1658 | HNH nuclease                               | 333  | 0.000 | 0.000 |
| Blon_1659 | hypothetical protein                       | 192  | 0.000 | 0.000 |
| Blon_1660 | hypothetical protein                       | 525  | 0.000 | 0.000 |
| Blon_1661 | hypothetical protein                       | 1059 | 0.000 | 0.000 |
| Blon_1664 | GCN5-related N-acetyltransferase           | 519  | 0.000 | 0.006 |
| Blon_1667 | hypothetical protein                       | 480  | 0.000 | 0.000 |
| Blon_1668 | hypothetical protein                       | 528  | 0.002 | 0.000 |
| Blon_1669 | hypothetical protein                       | 267  | 0.015 | 0.004 |
| Blon_1670 | hypothetical protein                       | 846  | 0.018 | 0.001 |
| Blon_1734 | hypothetical protein                       | 141  | 0.000 | 0.000 |
| Blon_1735 | hypothetical protein                       | 885  | 0.000 | 0.000 |
| Blon_1736 | hypothetical protein                       | 267  | 0.000 | 0.000 |
| Blon_1737 | hypothetical protein                       | 327  | 0.000 | 0.000 |
| Blon_1738 | hypothetical protein                       | 393  | 0.000 | 0.000 |
| Blon_1782 | Uncharacterized conserved protein, COG4748 | 1089 | 0.000 | 0.000 |
| Blon_1783 | Domain of unknown function (DUF955).       | 330  | 0.000 | 0.000 |
| Blon_1784 | hypothetical protein                       | 255  | 0.000 | 0.000 |
| Blon_1785 | hypothetical protein                       | 255  | 0.000 | 0.000 |
| Blon_1786 | hypothetical protein                       | 507  | 0.000 | 0.000 |
| Blon_1787 | hypothetical protein                       | 762  | 0.000 | 0.000 |
| Blon_1788 | hypothetical protein                       | 243  | 0.000 | 0.000 |
| Blon_1789 | hypothetical protein                       | 345  | 0.000 | 0.000 |
| Blon_1790 | hypothetical protein                       | 231  | 0.000 | 0.000 |
| Blon_1794 | hypothetical protein                       | 525  | 0.000 | 0.000 |
| Blon_1796 | hypothetical protein                       | 393  | 0.000 | 0.000 |
| Blon_1797 | hypothetical protein                       | 411  | 0.000 | 0.000 |
| Blon_1798 | hypothetical protein                       | 303  | 0.000 | 0.000 |
| Blon_1799 | hypothetical protein                       | 306  | 0.000 | 0.000 |

|           |                                                   |      |       |       |
|-----------|---------------------------------------------------|------|-------|-------|
| Blon_1800 | hypothetical protein                              | 210  | 0.000 | 0.000 |
| Blon_1801 | hypothetical protein                              | 597  | 0.000 | 0.000 |
| Blon_1802 | hypothetical protein                              | 297  | 0.000 | 0.000 |
| Blon_1803 | hypothetical protein                              | 303  | 0.000 | 0.000 |
| Blon_1804 | hypothetical protein                              | 363  | 0.000 | 0.000 |
| Blon_1805 | hypothetical protein                              | 225  | 0.000 | 0.000 |
| Blon_1806 | hypothetical protein                              | 210  | 0.000 | 0.000 |
| Blon_1807 | hypothetical protein                              | 774  | 0.012 | 0.005 |
| Blon_1808 | hypothetical protein                              | 198  | 0.000 | 0.000 |
| Blon_1809 | hypothetical protein                              | 351  | 0.000 | 0.000 |
| Blon_1810 | hypothetical protein                              | 411  | 0.000 | 0.000 |
| Blon_1811 | phage Terminase                                   | 1404 | 0.000 | 0.000 |
| Blon_1812 | Protein of unknown function (DUF1483).            | 1494 | 0.000 | 0.000 |
| Blon_1813 | hypothetical protein                              | 1419 | 0.000 | 0.000 |
| Blon_1814 | hypothetical protein                              | 465  | 0.000 | 0.000 |
| Blon_1815 | phage structural protein                          | 942  | 0.000 | 0.000 |
| Blon_1816 | hypothetical protein                              | 564  | 0.000 | 0.000 |
| Blon_1817 | hypothetical protein                              | 408  | 0.000 | 0.000 |
| Blon_1818 | hypothetical protein                              | 345  | 0.000 | 0.000 |
| Blon_1819 | hypothetical protein                              | 276  | 0.000 | 0.000 |
| Blon_1820 | hypothetical protein                              | 378  | 0.000 | 0.000 |
| Blon_1821 | prophage LambdaSa03, structural protein, putative | 600  | 0.000 | 0.000 |
| Blon_1822 | hypothetical protein                              | 366  | 0.000 | 0.005 |
| Blon_1824 | hypothetical protein                              | 978  | 0.000 | 0.000 |
| Blon_1826 | hypothetical protein                              | 573  | 0.000 | 0.000 |
| Blon_1827 | hypothetical protein                              | 171  | 0.000 | 0.000 |
| Blon_1828 | hypothetical protein                              | 510  | 0.000 | 0.000 |
| Blon_1829 | hypothetical protein                              | 456  | 0.000 | 0.000 |
| Blon_1830 | hypothetical protein                              | 396  | 0.000 | 0.000 |
| Blon_1831 | glycoside hydrolase, family 25                    | 1233 | 0.010 | 0.000 |
| Blon_1832 | holin                                             | 219  | 0.000 | 0.000 |
| Blon_1903 | hypothetical protein                              | 408  | 0.000 | 0.000 |
| Blon_1906 | RnfABCDGE type, D subunit                         | 1086 | 0.000 | 0.000 |
| Blon_2099 | polysaccharide biosynthesis protein               | 1536 | 0.001 | 0.098 |
| Blon_2104 | glycosyl transferase, family 14                   | 882  | 0.000 | 0.000 |
| Blon_2105 | Capsular polysaccharide synthesis                 | 954  | 0.000 | 0.000 |
| Blon_2108 | hypothetical protein                              | 1170 | 0.000 | 0.000 |
| Blon_2110 | glycosyltransferase                               | 819  | 0.000 | 0.035 |
| Blon_2122 | metallophosphoesterase                            | 2457 | 0.048 | 0.057 |
| Blon_2155 | Cytochrome P450-like                              | 1113 | 0.000 | 0.000 |
| Blon_2158 | hypothetical protein                              | 915  | 0.000 | 0.152 |
| Blon_2275 | hypothetical protein                              | 201  | 0.000 | 0.000 |
| Blon_2382 | hypothetical protein                              | 1128 | 0.000 | 0.000 |
| Blon_2388 | glycosyl transferase, family 8                    | 1791 | 0.000 | 0.000 |
| Blon_2389 | UDP-glucose/GDP-mannose dehydrogenase             | 1245 | 0.000 | 0.000 |

**Genes common to ATCC15697 and JCM1272 OR JCM11346**

|           |                                         |      |       |       |
|-----------|-----------------------------------------|------|-------|-------|
| Blon_0015 | None                                    | 213  | 0.000 | 0.601 |
| Blon_0041 | hypothetical protein                    | 1563 | 0.000 | 1.596 |
| Blon_0098 | hypothetical protein                    | 348  | 1.152 | 0.000 |
| Blon_0099 | hypothetical protein                    | 240  | 1.108 | 0.000 |
| Blon_0121 | hypothetical protein                    | 627  | 0.927 | 0.002 |
| Blon_0122 | hypothetical protein                    | 189  | 0.857 | 0.021 |
| Blon_0213 | hypothetical protein                    | 300  | 0.000 | 0.543 |
| Blon_0239 | hypothetical protein                    | 693  | 1.387 | 0.000 |
| Blon_0241 | ABC-2 type transporter                  | 771  | 2.162 | 0.000 |
| Blon_0245 | major facilitator superfamily MFS_1     | 1206 | 1.434 | 0.000 |
| Blon_0269 | None                                    | 486  | 0.340 | 0.099 |
| Blon_0284 | hypothetical protein                    | 162  | 2.302 | 0.000 |
| Blon_0285 | alpha/beta superfamily hydrolase        | 735  | 1.951 | 0.000 |
| Blon_0286 | lactoylglutathione lyase (LGUL) family  | 348  | 1.560 | 0.000 |
| Blon_0289 | None                                    | 950  | 2.012 | 0.000 |
| Blon_0290 | Glyoxalase/bleomycin resistance protein | 501  | 2.166 | 0.000 |
| Blon_0291 | hypothetical protein                    | 396  | 2.545 | 0.000 |

|           |                                                     |      |       |       |
|-----------|-----------------------------------------------------|------|-------|-------|
| Blon_0292 | helix-turn-helix domain protein                     | 552  | 2.625 | 0.000 |
| Blon_0293 | hypothetical protein                                | 216  | 1.407 | 0.000 |
| Blon_0294 | hypothetical protein                                | 192  | 1.813 | 0.000 |
| Blon_0295 | plasmid replication protein                         | 411  | 1.564 | 0.000 |
| Blon_0296 | hypothetical protein                                | 849  | 1.344 | 0.000 |
| Blon_0297 | hypothetical protein                                | 168  | 1.399 | 0.000 |
| Blon_0298 | hypothetical protein                                | 1068 | 1.902 | 0.000 |
| Blon_0347 | hypothetical protein                                | 1179 | 0.020 | 0.757 |
| Blon_0378 | hypothetical protein                                | 1968 | 0.000 | 1.589 |
| Blon_0465 | hypothetical protein                                | 363  | 0.747 | 0.000 |
| Blon_0466 | hypothetical protein                                | 399  | 1.000 | 0.000 |
| Blon_0467 | ABC-type transport system, permease                 | 1425 | 0.852 | 0.000 |
| Blon_0470 | Lanthionine synthetase C family protein             | 2658 | 2.140 | 0.000 |
| Blon_0487 | hypothetical protein                                | 789  | 0.190 | 0.850 |
| Blon_0488 | hypothetical protein                                | 261  | 0.939 | 0.000 |
| Blon_0503 | None                                                | 414  | 1.169 | 0.000 |
| Blon_0504 | hypothetical protein                                | 381  | 1.220 | 0.000 |
| Blon_0505 | hypothetical protein                                | 825  | 1.079 | 0.000 |
| Blon_0506 | hypothetical protein                                | 207  | 0.411 | 0.000 |
| Blon_0507 | hypothetical protein                                | 360  | 1.256 | 0.000 |
| Blon_0511 | hypothetical protein                                | 405  | 0.817 | 0.000 |
| Blon_0512 | hypothetical protein                                | 687  | 1.217 | 0.000 |
| Blon_0525 | hypothetical protein                                | 741  | 0.000 | 1.839 |
| Blon_0526 | helix-turn-helix domain protein                     | 1206 | 0.000 | 2.080 |
| Blon_0556 | hypothetical protein                                | 369  | 1.062 | 0.111 |
| Blon_0563 | transposase IS116/IS110/IS902 family protein        | 1200 | 0.349 | 0.180 |
| Blon_0616 | transposase, IS605 OrfB family                      | 1305 | 1.324 | 0.126 |
| Blon_0661 | Na-galactoside symporter                            | 1533 | 0.000 | 2.043 |
| Blon_0667 | Mandelate lactonizing enzyme                        | 1248 | 0.000 | 1.393 |
| Blon_0668 | Mannitol dehydrogenase, C-terminal domain           | 1395 | 0.000 | 1.092 |
| Blon_0669 | Glucuronate isomerase                               | 1431 | 0.001 | 1.484 |
| Blon_0670 | HIT family hydrolase                                | 429  | 0.000 | 1.739 |
| Blon_0763 | Integrase, catalytic region                         | 666  | 1.135 | 0.135 |
| Blon_0863 | ABC-2 type transporter                              | 732  | 0.000 | 0.904 |
| Blon_0866 | hypothetical protein                                | 297  | 0.000 | 0.566 |
| Blon_0981 | hypothetical protein                                | 897  | 1.397 | 0.000 |
| Blon_0983 | phage integrase family protein                      | 1344 | 0.700 | 0.000 |
| Blon_0990 | Bacterial protein of unknown function (DUF961).     | 381  | 1.071 | 0.000 |
| Blon_0991 | hypothetical protein                                | 438  | 1.760 | 0.000 |
| Blon_0992 | hypothetical protein                                | 234  | 0.996 | 0.000 |
| Blon_0998 | transposase for IS3509a                             | 1137 | 0.051 | 3.081 |
| Blon_1022 | hypothetical protein                                | 390  | 0.000 | 2.074 |
| Blon_1023 | hypothetical protein                                | 1125 | 0.000 | 1.839 |
| Blon_1025 | transposase IS116/IS110/IS902 family protein        | 1266 | 0.024 | 0.567 |
| Blon_1026 | hypothetical protein                                | 399  | 0.000 | 1.080 |
| Blon_1027 | hypothetical protein                                | 720  | 0.000 | 1.461 |
| Blon_1028 | hypothetical protein                                | 903  | 0.000 | 1.420 |
| Blon_1029 | Methylase of polypeptide chain release factors-like | 1137 | 0.000 | 1.434 |
| Blon_1031 | None                                                | 606  | 0.033 | 1.287 |
| Blon_1037 | hypothetical protein                                | 285  | 0.786 | 0.000 |
| Blon_1038 | hypothetical protein                                | 540  | 1.624 | 0.000 |
| Blon_1039 | Integrase, catalytic region                         | 1116 | 0.669 | 0.122 |
| Blon_1168 | transposase for IS3509a                             | 1110 | 0.011 | 0.591 |
| Blon_1230 | hypothetical protein                                | 759  | 0.888 | 0.000 |
| Blon_1241 | transposase IS116/IS110/IS902 family protein        | 1200 | 0.356 | 0.180 |
| Blon_1377 | Selenocysteine lyase-like                           | 660  | 0.000 | 0.605 |
| Blon_1385 | hypothetical protein                                | 513  | 1.612 | 0.094 |
| Blon_1387 | Uncharacterized conserved protein, COG0585          | 1038 | 1.845 | 0.000 |
| Blon_1398 | addiction module antitoxin, RelB/DinJ family        | 264  | 0.000 | 1.038 |
| Blon_1399 | addiction module toxin, RelE/StbE family            | 294  | 0.000 | 0.769 |
| Blon_1412 | transposase IS116/IS110/IS902 family protein        | 1203 | 0.329 | 0.170 |
| Blon_1423 | amidohydrolase-like                                 | 324  | 0.750 | 0.003 |
| Blon_1437 | Uncharacterized conserved protein, COG3189          | 351  | 0.134 | 1.088 |

|           |                                              |      |       |       |
|-----------|----------------------------------------------|------|-------|-------|
| Blon_1567 | transposase IS116/IS110/IS902 family protein | 1203 | 0.357 | 0.181 |
| Blon_1625 | hypothetical protein                         | 435  | 0.000 | 0.269 |
| Blon_1653 | hypothetical protein                         | 222  | 0.680 | 0.000 |
| Blon_1671 | hypothetical protein                         | 375  | 0.003 | 0.347 |
| Blon_1724 | None                                         | 213  | 1.202 | 0.000 |
| Blon_1933 | hypothetical protein                         | 717  | 2.128 | 0.000 |
| Blon_1964 | hypothetical protein                         | 720  | 1.154 | 0.001 |
| Blon_1969 | ribosomal protein L36                        | 123  | 1.398 | 0.000 |
| Blon_2053 | hypothetical protein                         | 261  | 1.383 | 0.000 |
| Blon_2090 | hypothetical protein                         | 537  | 0.000 | 1.760 |
| Blon_2091 | hypothetical protein                         | 327  | 0.000 | 1.584 |
| Blon_2092 | hypothetical protein                         | 864  | 0.000 | 1.520 |
| Blon_2093 | hypothetical protein                         | 2811 | 0.000 | 1.896 |
| Blon_2100 | hypothetical protein                         | 696  | 0.359 | 0.000 |
| Blon_2113 | transposase IS116/IS110/IS902 family protein | 1203 | 0.350 | 0.181 |
| Blon_2282 | hypothetical protein                         | 180  | 0.939 | 0.167 |
| Blon_2373 | GCN5-related N-acetyltransferase             | 447  | 0.969 | 0.000 |
| Blon_2402 | N-acylglucosamine-6-phosphate 2-epimerase    | 696  | 0.000 | 1.342 |
| Blon_2431 | transposase for IS3509a                      | 1137 | 0.050 | 3.131 |

<sup>1</sup> Hits/bp refer to number of observed BLASTN alignments to a ATCC15697 gene per length

<sup>2</sup> Values highlighted in yellow present a low hit density ( $0.25 \geq 0.5$ ) that may or may not signal homolog presence
