# Supplementary material
Source: PubMed Central journal article supplement (PMC2596198)
Supplement: 0809584105_ST6_PDF.pdf [file 0809584105_ST6_PDF.pdf]

**Table S6. Proteomic profile of *B. longum* subsp. *infantis* ATCC15697 grown on HMO**

| Locus Tag                                           | Description                                                          | MW (kD) | <i>P</i> <sup>1</sup> | Sample 1        |               |                   | Sample 2 |                 |               |                   |
|-----------------------------------------------------|----------------------------------------------------------------------|---------|-----------------------|-----------------|---------------|-------------------|----------|-----------------|---------------|-------------------|
|                                                     |                                                                      |         |                       | Unique peptides | Total spectra | Sequence coverage | <i>P</i> | Unique peptides | Total spectra | Sequence coverage |
| <b>Central fermentative pathway proteins</b>        |                                                                      |         |                       |                 |               |                   |          |                 |               |                   |
| Blon_0565                                           | Putative glucokinase                                                 | 32.8    | 99%                   | 2               | 3             | 6%                | 99%      | 2               | 2             | 9%                |
| Blon_0417                                           | Glucose-6-phosphate isomerase                                        | 62.8    | 100%                  | 18              | 81            | 34%               | 100%     | 24              | 106           | 46%               |
| Blon_1722                                           | Fructose-6-phosphate phosphoketolase                                 | 92.4    | 100%                  | 38              | 191           | 42%               | 100%     | 42              | 243           | 54%               |
| Blon_1095                                           | Transaldolase                                                        | 39.6    | 100%                  | 22              | 173           | 54%               | 100%     | 24              | 273           | 67%               |
| Blon_1096                                           | Transketolase                                                        | 75.7    | 100%                  | 18              | 81            | 25%               | 100%     | 27              | 140           | 38%               |
| Blon_2191                                           | Ribose 5-phosphate isomerase                                         | 25.2    | 99%                   | 2               | 14            | 14%               | 100%     | 5               | 16            | 23%               |
| Blon_1368                                           | Ribulose-phosphate 3-epimerase                                       | 24.1    | 99%                   | 2               | 3             | 11%               |          |                 |               |                   |
| Blon_0900                                           | Glyceraldehyde-3-phosphate dehydrogenase                             | 37.8    | 100%                  | 16              | 97            | 38%               | 100%     | 15              | 46            | 37%               |
| Blon_1087                                           | Phosphoglycerate kinase                                              | 41.9    | 100%                  | 12              | 38            | 41%               | 100%     | 24              | 94            | 61%               |
| Blon_2152                                           | Phosphoglycerate mutase                                              | 27.6    | 100%                  | 10              | 154           | 44%               | 100%     | 15              | 66            | 60%               |
| Blon_1731                                           | Acetate kinase                                                       | 44.1    | 100%                  | 13              | 47            | 44%               | 100%     | 20              | 80            | 54%               |
| Blon_1836                                           | Enolase                                                              | 46.6    | 100%                  | 15              | 134           | 35%               | 100%     | 19              | 196           | 47%               |
| Blon_1745                                           | Pyruvate kinase                                                      | 52.1    | 100%                  | 20              | 81            | 44%               | 100%     | 26              | 105           | 54%               |
| Blon_0840                                           | L-lactate dehydrogenase                                              | 34.2    | 100%                  | 8               | 35            | 26%               | 100%     | 12              | 71            | 41%               |
| <b>Catabolic enzymes active on HMO constituents</b> |                                                                      |         |                       |                 |               |                   |          |                 |               |                   |
| Blon_2062                                           | Galactokinase                                                        | 44.2    | 100%                  | 9               | 27            | 24%               | 100%     | 11              | 37            | 31%               |
| Blon_2171                                           | UDP-glucose 4-epimerase                                              | 37.2    | 100%                  | 3               | 14            | 13%               | 100%     | 7               | 18            | 33%               |
| Blon_2184                                           | Phosphoglucomutase                                                   | 60.2    | 100%                  | 19              | 49            | 40%               | 100%     | 22              | 55            | 43%               |
| Blon_2349                                           | N-acetylneuraminatase lyase                                          | 34.0    |                       |                 |               |                   | 99%      | 2               | 2             | 8%                |
| Blon_2031                                           | Phosphoglucosamine mutase                                            | 48.6    | 100%                  | 3               | 3             | 8%                | 100%     | 10              | 16            | 24%               |
| Blon_0882                                           | N-acetylglucosamine-6-phosphate deacetylase                          | 45.2    | 100%                  | 4               | 11            | 14%               | 100%     | 4               | 8             | 14%               |
| Blon_0881                                           | Glucosamine-6-phosphate isomerase                                    | 28.7    | 100%                  | 11              | 147           | 28%               | 100%     | 10              | 111           | 41%               |
| Blon_0540                                           | Lactaldehyde reductase                                               | 40.5    | 100%                  | 4               | 7             | 10%               | 100%     | 5               | 28            | 18%               |
| <b>43 kbp HMO cluster proteins</b>                  |                                                                      |         |                       |                 |               |                   |          |                 |               |                   |
| Blon_2334                                           | Beta-galactosidase                                                   | 114.5   | 100%                  | 8               | 14            | 9%                | 100%     | 17              | 39            | 22%               |
| Blon_2336                                           | alpha-fucosidase                                                     | 53.0    | 100%                  | 3               | 12            | 8%                | 100%     | 6               | 10            | 14%               |
| Blon_2338                                           | Dihydrodipicolinate synthetase                                       | 32.0    | 100%                  | 4               | 21            | 23%               | 100%     | 6               | 40            | 32%               |
| Blon_2339                                           | oxidoreductase                                                       | 28.6    | 100%                  | 3               | 4             | 13%               | 100%     | 5               | 10            | 30%               |
| Blon_2340                                           | Mandelate racemase/muconate lactonizing enzyme, C-terminal domain    | 47.2    | 100%                  | 10              | 48            | 30%               | 100%     | 11              | 34            | 30%               |
| Blon_2343                                           | Binding-protein-dependent transport systems inner membrane component | 35.3    | 98%                   | 2               | 5             | 6%                |          |                 |               |                   |
| Blon_2344                                           | Extracellular solute-binding protein, family 1                       | 58.7    | 100%                  | 9               | 30            | 21%               | 100%     | 19              | 64            | 37%               |
| Blon_2347                                           | Extracellular solute-binding protein, family 1                       | 58.7    | 100%                  | 4               | 6             | 11%               | 100%     | 12              | 33            | 37%               |
| Blon_2348                                           | Sialidase II                                                         | 42.0    | 99%                   | 2               | 3             | 7%                |          |                 |               |                   |
| Blon_2349                                           | N-acetylneuraminatase lyase                                          | 34.0    |                       |                 |               |                   | 99%      | 2               | 2             | 8%                |
| Blon_2352                                           | Extracellular solute-binding protein, family 1                       | 58.6    |                       |                 |               |                   | 100%     | 3               | 4             | 18%               |

<sup>1</sup> Probability score (see proteomics methods)
