# Supplementary material
Source: PubMed Central journal article supplement (PMC2596198)
Supplement: 0809584105_ST8_PDF.pdf [file 0809584105_ST8_PDF.pdf]

**Table S8. Catabolic genes predicted in HMO utilization by *B. longum* subsp. *infantis* ATCC15697**

| Pathway <sup>1</sup>               | Gene name                                   | Gene symbol | Locus tag |
|------------------------------------|---------------------------------------------|-------------|-----------|
| Leloir pathway genes               |                                             |             |           |
|                                    | galactokinase                               | <i>galK</i> | Blon_2062 |
|                                    | UDP-glucose 4-epimerase                     | <i>galE</i> | Blon_2171 |
|                                    | galactose-1-phosphate uridylyltransferase   | <i>galT</i> | Blon_2172 |
|                                    | phosphoglucomutase                          | <i>pgm</i>  | Blon_2184 |
| Central fermentative pathway genes |                                             |             |           |
| 1                                  | glucokinase                                 | <i>glkA</i> | Blon_0565 |
| 1                                  | glucose-6-phosphate isomerase               | <i>gpi</i>  | Blon_0417 |
| 2                                  | fructose-6-phosphate phosphoketolase        | <i>xfp</i>  | Blon_1722 |
| 3                                  | transaldolase                               | <i>tal</i>  | Blon_1095 |
| 4                                  | transketolase                               | <i>tkt</i>  | Blon_1096 |
| 5                                  | ribose 5-phosphate isomerase                | <i>rpiA</i> | Blon_2191 |
| 6                                  | ribulose 5-phosphate epimerase              | <i>rpe</i>  | Blon_1368 |
| 7                                  | xylulose-5-phosphate phosphoketolase        | <i>xfp</i>  | Blon_1722 |
| 8                                  | acetate kinase                              | <i>ackA</i> | Blon_1731 |
| 9                                  | glyceraldehyde-3-phosphate dehydrogenase    | <i>gap</i>  | Blon_0900 |
| 10                                 | phosphoglycerate kinase                     | <i>pgk</i>  | Blon_1087 |
| 11                                 | phosphoglycerate mutase                     | <i>pmg</i>  | Blon_2152 |
| 12                                 | enolase                                     | <i>eno</i>  | Blon_1836 |
| 13                                 | pyruvate kinase                             | <i>pyk</i>  | Blon_1745 |
| 14                                 | lactate dehydrogenase                       | <i>ldh</i>  | Blon_0840 |
| Sialic acid genes                  |                                             |             |           |
| 15                                 | N-acetylneuraminate lyase                   | <i>nanA</i> | Blon_2349 |
| 16                                 | N-acetylmannosamine kinase                  | <i>nanK</i> | Blon_0644 |
| 17                                 | N-acetylmannosamine-6-phosphate 2-epimerase | <i>nanE</i> | Blon_0645 |
| N-acetylglucosamine genes          |                                             |             |           |
| 18                                 | N-acetylhexosamine 1-kinase                 | <i>nahK</i> | Blon_2173 |
| 19                                 | phosphoglucoamine mutase                    | <i>glmM</i> | Blon_2031 |
| 20                                 | N-acetylglucosamine-6-phosphate deacetylase | <i>nagA</i> | Blon_0882 |
| 21                                 | glucosamine-6-phosphate isomerase           | <i>nagB</i> | Blon_0881 |
| Fucose genes                       |                                             |             |           |
| ?                                  | fucose isomerase                            | <i>fucI</i> | NOT FOUND |
| ?                                  | fuculose kinase                             | <i>fucK</i> | NOT FOUND |
| ?                                  | L-fuculose phosphate aldolase               | <i>fucA</i> | NOT FOUND |
| 22                                 | lactaldehyde reductase                      | <i>fucO</i> | Blon_0540 |
| 23                                 | triose-phosphate isomerase                  | <i>tpiA</i> | Blon_1088 |

<sup>1</sup> Number refers to representation in figure 2.
